# Supplementary material
Source: PubMed Central journal article supplement (PMC7211988)
Supplement: pnas.1919048117.sapp.pdf [file pnas.1919048117.sapp.pdf]

## Supplemental Figure Captions

### **Figure S1. T<sub>2</sub>-weighted MRI images of control and ethanol-exposed fetuses at G85**

Following rigid-body transformation to a G85 T<sub>2</sub>-weighted brain template, T<sub>2</sub>-weighted images of (a) control and (b) ethanol-exposed fetal brains are shown for the a sagittal and a coronal slice. No gross anomalies were found in the ethanol-exposed fetuses. Scale bar in a = 10 mm.

### **Figure S2. T<sub>2</sub>-weighted MRI images of control and ethanol-exposed fetuses at G110**

Following rigid-body transformation to a G110 T<sub>2</sub>-weighted brain template, T<sub>2</sub>-weighted images of (a) control and (b) ethanol-exposed fetal brains are shown for the a sagittal and a coronal slice. Significantly enlarged lateral ventricles (red arrow heads) were found in one (F10283) of the ethanol-exposed fetuses. Scale bar in a = 10 mm.

### **Figure S3. T<sub>2</sub>-weighted MRI images of control and ethanol-exposed fetuses at G135**

Following rigid-body transformation to a G135 T<sub>2</sub>-weighted brain template, T<sub>2</sub>-weighted images of (a) control and (b) ethanol-exposed fetal brains are shown for the a sagittal and a coronal slice. Significantly enlarged lateral ventricles (red arrow heads) were found in one (F10290) of the ethanol-exposed fetuses. Scale bar in a = 10 mm.

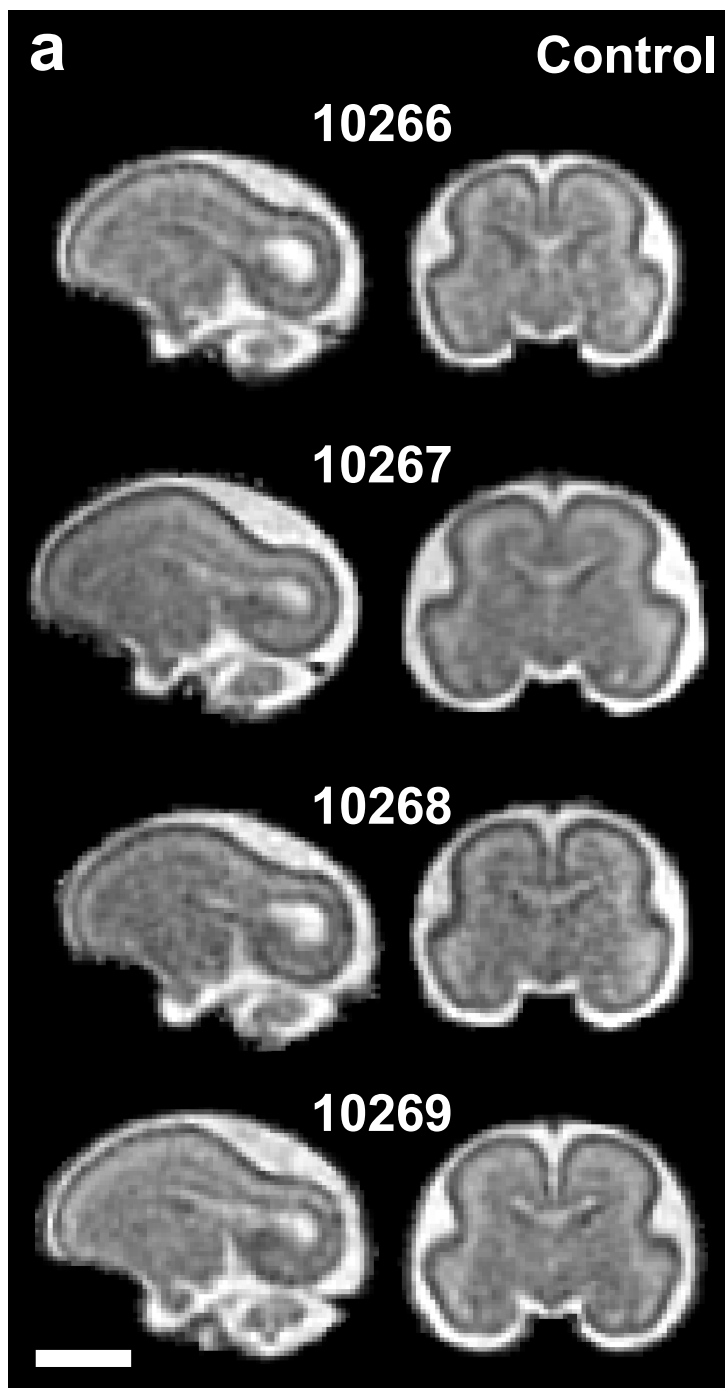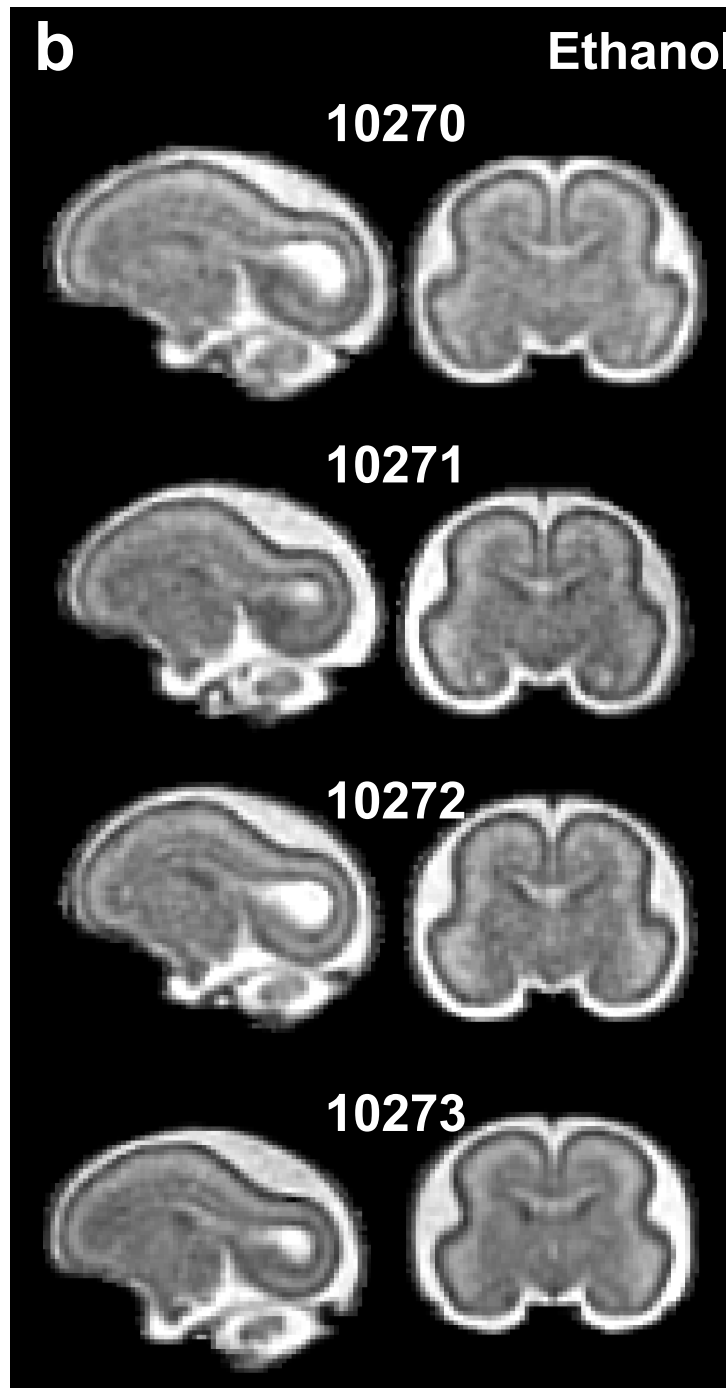

Figure S1

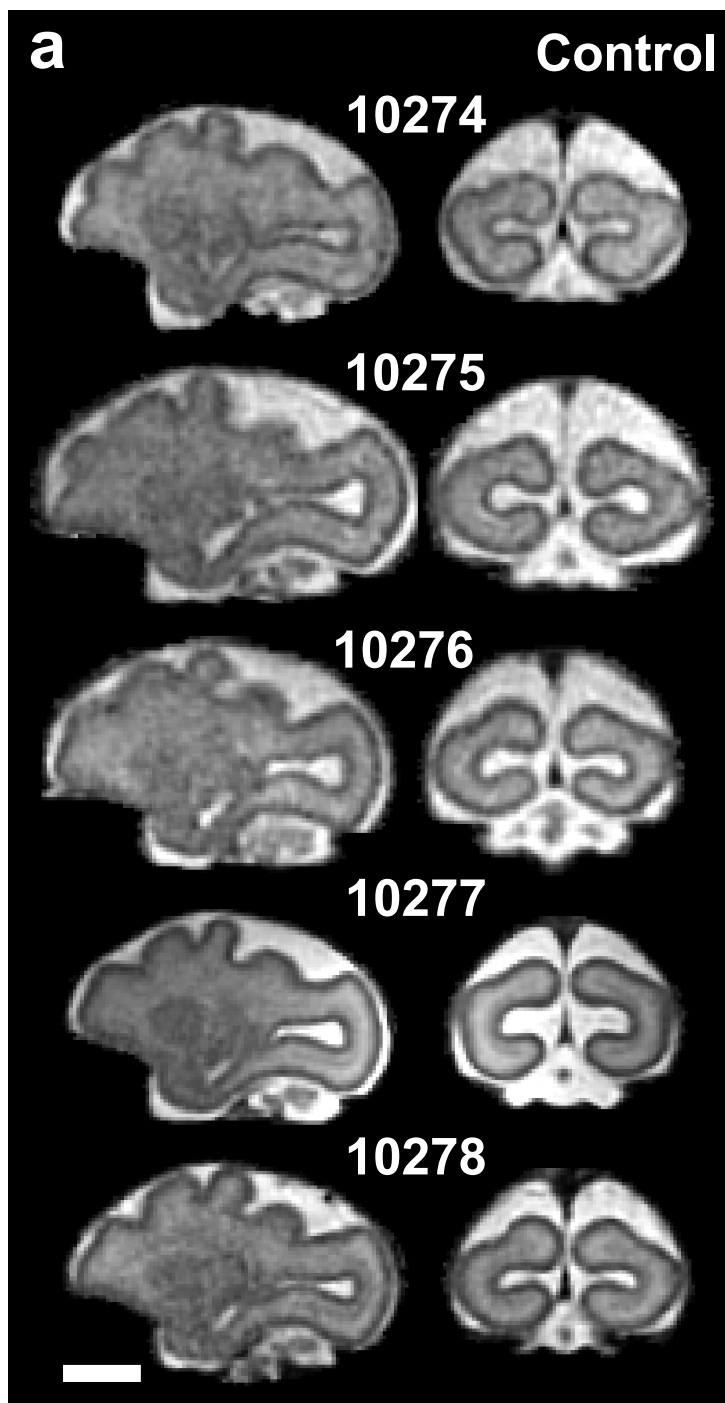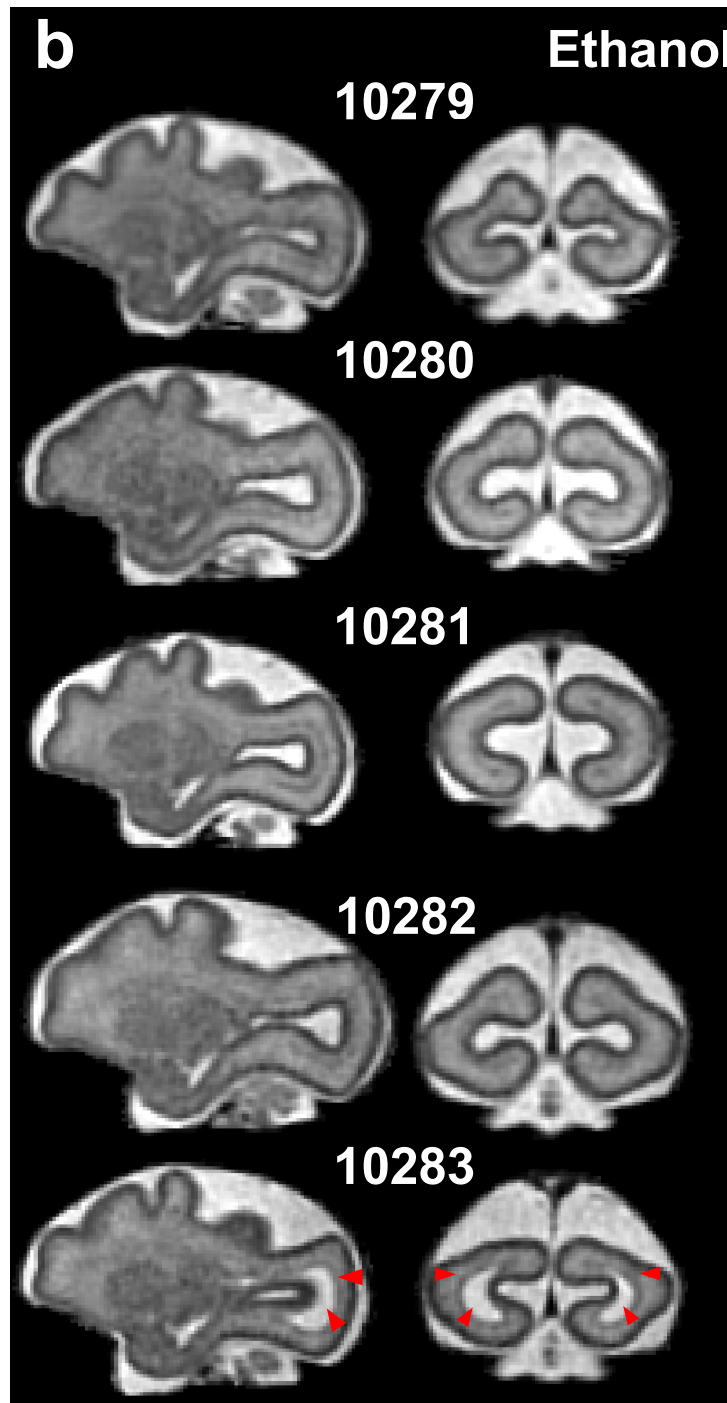

Figure S2

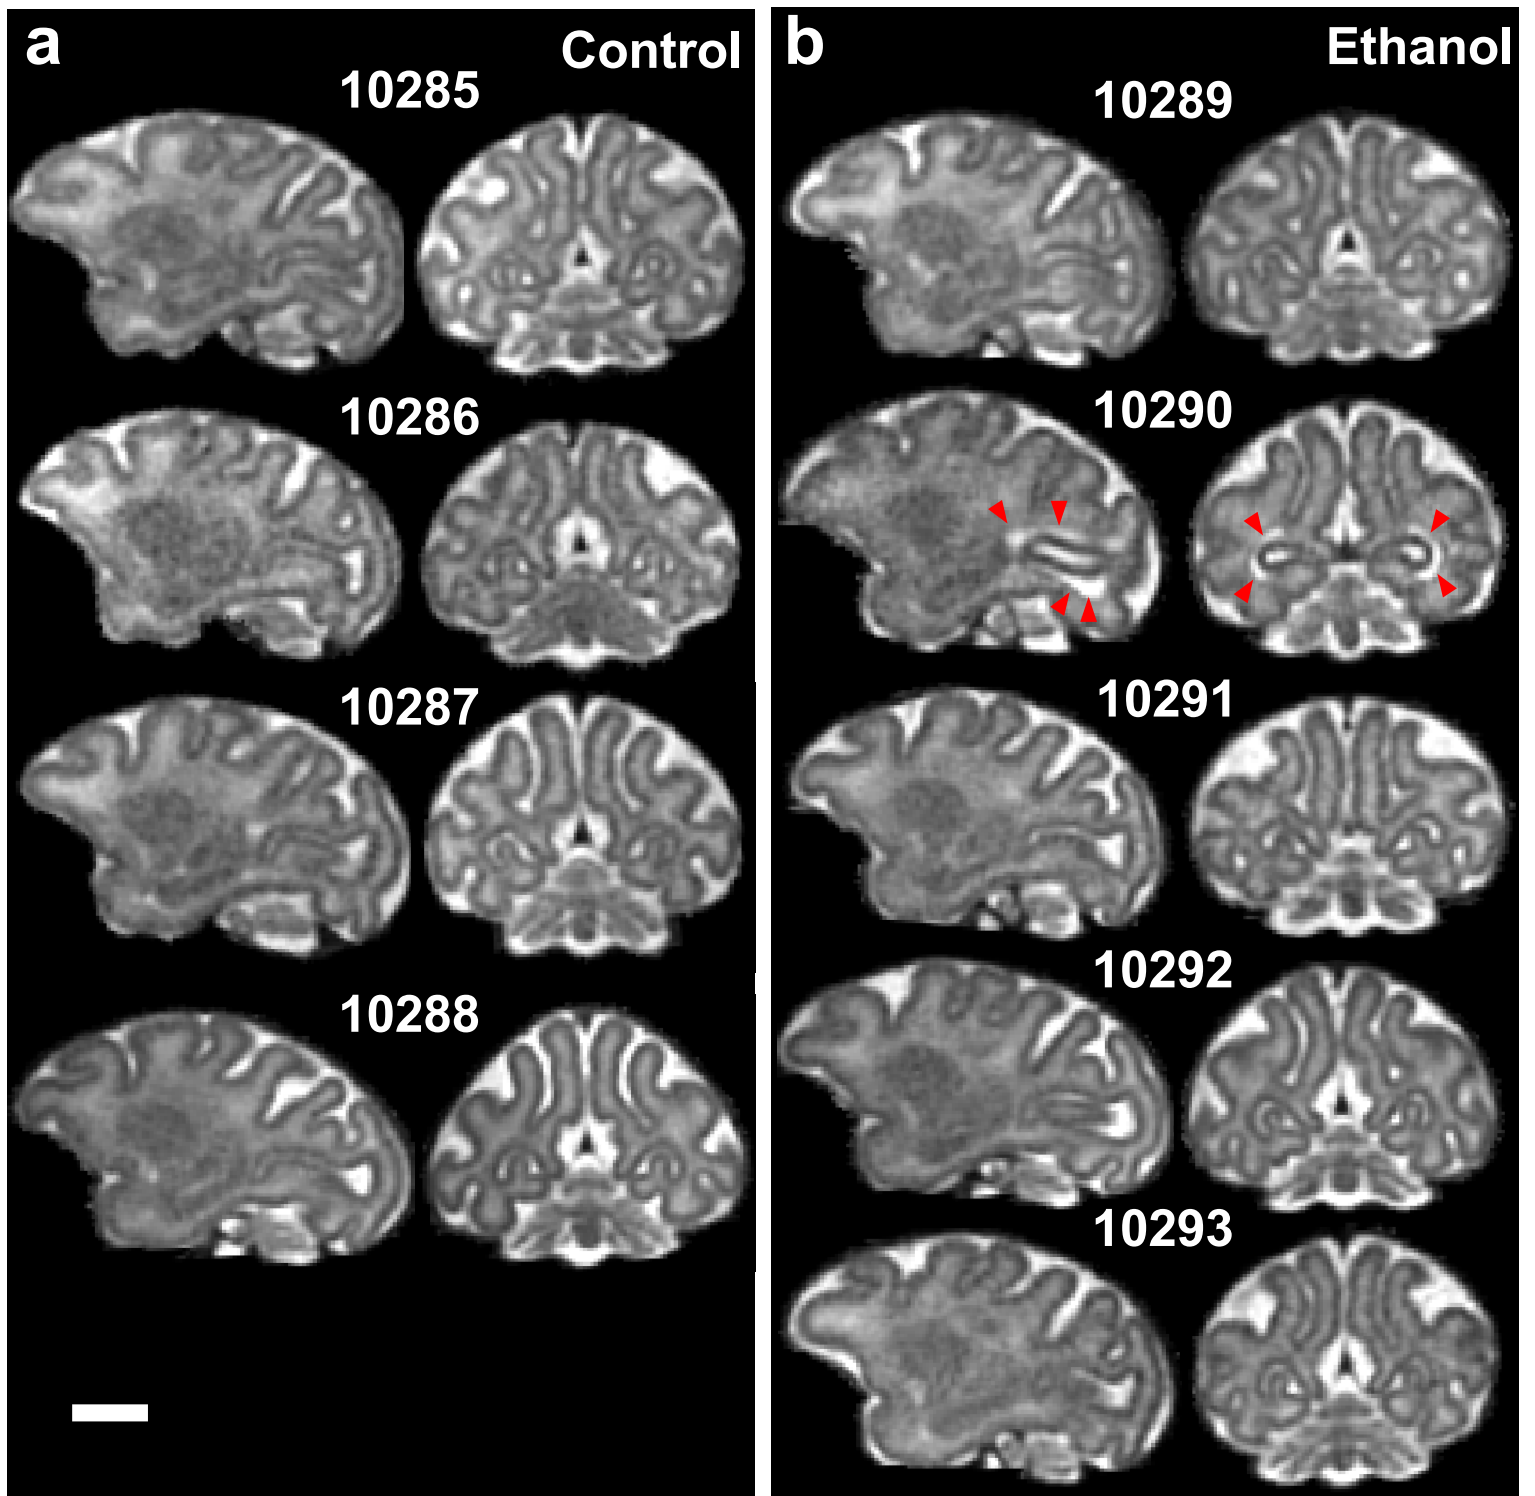

Figure S3

Table S1. ROI-based volumetric comparisons at G85

| <b>Structures</b>        | <b>Control</b> | <b>Ethanol</b> |
|--------------------------|----------------|----------------|
| <b>Cortical Plate</b>    | 2.49 ± 0.29    | 2.39 ± 0.20    |
| <b>Subplate &amp; IZ</b> | 3.90 ± 0.39    | 3.87 ± 0.38    |
| <b>Striatum</b>          | 0.16 ± 0.02    | 0.15 ± 0.01    |
| <b>Thalamus</b>          | 0.31 ± 0.03    | 0.30 ± 0.03    |
| <b>Brainstem</b>         | 0.45 ± 0.03    | 0.45 ± 0.03    |
| <b>Cerebellum</b>        | 0.19 ± 0.03    | 0.18 ± 0.01    |
| <b>Whole brain</b>       | 8.05 ± 0.82    | 7.88 ± 0.74    |

Table S2. ROI-based volumetric comparisons at G110

|                       | <b>Control</b> | <b>Ethanol</b> |
|-----------------------|----------------|----------------|
| <b>Cortical Plate</b> | 8.07 ± 1.48    | 8.24 ± 1.07    |
| <b>White Matter</b>   | 9.36 ± 0.95    | 9.40 ± 1.30    |
| <b>Striatum</b>       | 0.61 ± 0.07    | 0.63 ± 0.07    |
| <b>Thalamus</b>       | 0.69 ± 0.06    | 0.73 ± 0.07    |
| <b>Brainstem</b>      | 0.81 ± 0.08    | 0.83 ± 0.09    |
| <b>Cerebellum</b>     | 0.71 ± 0.10    | 0.68 ± 0.08    |
| <b>Whole brain</b>    | 20.72 ± 2.6    | 21.05 ± 2.67   |

Table S3. ROI-based group comparisons of FA at G110.

| <b>ROI</b>    | <b>Control</b> | <b>Ethanol</b> |
|---------------|----------------|----------------|
| <b>CC</b>     | 0.49 ± 0.12    | 0.49 ± 0.10    |
| <b>ALIC</b>   | 0.28 ± 0.06    | 0.29 ± 0.04    |
| <b>PLIC</b>   | 0.34 ± 0.08    | 0.34 ± 0.06    |
| <b>AC</b>     | 0.29 ± 0.09    | 0.30 ± 0.02    |
| <b>Fornix</b> | 0.32 ± 0.06    | 0.35 ± 0.02    |
| <b>CST</b>    | 0.30 ± 0.08    | 0.29 ± 0.07    |
| <b>SCP</b>    | 0.27 ± 0.05    | 0.27 ± 0.06    |
| <b>MCP</b>    | 0.30 ± 0.11    | 0.28 ± 0.04    |

Table S4. Pearson's correlation coefficients and associated p-values between BEC and MRI-derived metrics at G85.

| <b>Volumes</b>           | <b>r</b> | <b>p</b> |
|--------------------------|----------|----------|
| <b>Cortical Plate</b>    | -0.32    | 0.44     |
| <b>Subplate &amp; IZ</b> | -0.19    | 0.65     |
| <b>Striatum</b>          | -0.34    | 0.40     |
| <b>Thalamus</b>          | -0.39    | 0.34     |
| <b>Brainstem</b>         | -0.25    | 0.56     |
| <b>Cerebellum</b>        | -0.34    | 0.41     |
| <b>Whole brain</b>       | -0.25    | 0.55     |



Table S5. Pearson's correlation coefficients and associated p-values between BEC and MRI-derived metrics at G110.

| <b>Volumes</b>        | <b>r</b> | <b>p</b> |
|-----------------------|----------|----------|
| <b>Cortical Plate</b> | 0.23     | 0.52     |
| <b>White Matter</b>   | 0.17     | 0.63     |
| <b>Striatum</b>       | 0.32     | 0.36     |
| <b>Thalamus</b>       | 0.56     | 0.10     |
| <b>Brainstem</b>      | 0.35     | 0.31     |
| <b>Cerebellum</b>     | 0.07     | 0.86     |
| <b>Whole brain</b>    | 0.26     | 0.47     |
| <b>FA</b>             | <b>r</b> | <b>p</b> |
| <b>CC</b>             | 0.092    | 0.80     |
| <b>ALIC</b>           | 0.21     | 0.57     |
| <b>PLIC</b>           | 0.048    | 0.90     |
| <b>AC</b>             | 0.25     | 0.49     |
| <b>Fornix</b>         | 0.42     | 0.23     |
| <b>CST</b>            | 0.084    | 0.82     |
| <b>SCP</b>            | 0.028    | 0.94     |
| <b>MCP</b>            | -0.071   | 0.84     |

Table S6. Pearson's correlation coefficients and associated p-values between BEC and MRI-derived metrics at G135.

| <b>Volumes</b>        | <b>r</b>     | <b>p</b>     |
|-----------------------|--------------|--------------|
| <b>Cortical Plate</b> | -0.40        | 0.30         |
| <b>White Matter</b>   | -0.56        | 0.12         |
| <b>Striatum</b>       | -0.20        | 0.60         |
| <b>Thalamus</b>       | <b>-0.70</b> | <b>0.03</b>  |
| <b>Brainstem</b>      | <b>-0.67</b> | <b>0.05</b>  |
| <b>Cerebellum</b>     | -0.57        | 0.11         |
| <b>Whole brain</b>    | -0.61        | 0.08         |
| <b>FA</b>             | <b>r</b>     | <b>p</b>     |
| <b>CC</b>             | <b>-0.77</b> | <b>0.02</b>  |
| <b>AC</b>             | -0.65        | 0.06         |
| <b>ALIC</b>           | <b>-0.71</b> | <b>0.03</b>  |
| <b>PLIC</b>           | <b>-0.74</b> | <b>0.02</b>  |
| <b>Fornix</b>         | -0.65        | 0.06         |
| <b>CST</b>            | <b>-0.84</b> | <b>0.004</b> |
| <b>SCP</b>            | <b>-0.70</b> | <b>0.04</b>  |
| <b>MCP</b>            | -0.63        | 0.07         |
| <b>EC</b>             | -0.62        | 0.08         |
| <b>PTR</b>            | -0.46        | 0.21         |
| <b>Cereb.Ped.</b>     | -0.58        | 0.10         |

Table S7. Pearson's correlation coefficients and associated p-values between white matter FA and sEPSC frequencies recorded from the SS, putamen, and caudate.

|                    | <b>SS sEPSC<br/>Frequency</b> |      | <b>Putamen sEPSC<br/>Frequency</b> |      | <b>Caudate sEPSC<br/>Frequency</b> |       |
|--------------------|-------------------------------|------|------------------------------------|------|------------------------------------|-------|
|                    | r                             | p    | r                                  | p    | r                                  | p     |
| <b>CC</b>          | 0.40                          | 0.37 | 0.0059                             | 0.99 | 0.45                               | 0.31  |
| <b>ALIC</b>        | 0.47                          | 0.29 | 0.29                               | 0.48 | 0.32                               | 0.48  |
| <b>PLIC</b>        | 0.54                          | 0.20 | 0.13                               | 0.76 | 0.42                               | 0.34  |
| <b>AC</b>          | -0.019                        | 0.97 | 0.34                               | 0.41 | -0.074                             | 0.87  |
| <b>Fornix</b>      | 0.68                          | 0.10 | 0.29                               | 0.48 | 0.61                               | 0.14  |
| <b>CST</b>         | 0.35                          | 0.45 | -0.062                             | 0.88 | 0.13                               | 0.78  |
| <b>SCP</b>         | 0.38                          | 0.40 | 0.31                               | 0.45 | 0.10                               | 0.83  |
| <b>EC</b>          | 0.57                          | 0.18 | 0.045                              | 0.92 | 0.51                               | 0.24  |
| <b>PTR</b>         | 0.45                          | 0.31 | 0.29                               | 0.49 | 0.70                               | 0.077 |
| <b>Cereb. Ped.</b> | 0.46                          | 0.30 | 0.29                               | 0.48 | 0.34                               | 0.45  |
| <b>MCP</b>         | 0.50                          | 0.26 | 0.50                               | 0.21 | 0.37                               | 0.41  |

Table S8. Pearson's correlation coefficients and associated p-values between white matter FA and sIPSC amplitudes recorded from the SS, putamen, and caudate.

|                    | SS sIPSC Amplitude |       | Putamen sIPSC Amplitude |       | Caudate sIPSC Amplitude |      |
|--------------------|--------------------|-------|-------------------------|-------|-------------------------|------|
|                    | r                  | p     | r                       | p     | r                       | p    |
| <b>CC</b>          | 0.29               | 0.53  | 0.062                   | 0.88  | -0.45                   | 0.30 |
| <b>ALIC</b>        | 0.44               | 0.32  | 0.019                   | 0.96  | -0.57                   | 0.18 |
| <b>PLIC</b>        | 0.42               | 0.35  | 0.060                   | 0.89  | -0.61                   | 0.24 |
| <b>AC</b>          | 0.35               | 0.44  | -0.017                  | 0.97  | -0.57                   | 0.18 |
| <b>Fornix</b>      | 0.69               | 0.085 | 0.67                    | 0.068 | 0.30                    | 0.52 |
| <b>CST</b>         | 0.43               | 0.33  | 0.023                   | 0.96  | -0.30                   | 0.51 |
| <b>SCP</b>         | 0.40               | 0.38  | 0.11                    | 0.80  | -0.50                   | 0.26 |
| <b>EC</b>          | 0.20               | 0.67  | -0.16                   | 0.71  | -0.65                   | 0.11 |
| <b>PTR</b>         | 0.12               | 0.80  | 0.051                   | 0.90  | -0.59                   | 0.16 |
| <b>Cereb. Ped.</b> | 0.42               | 0.35  | 0.077                   | 0.86  | -0.62                   | 0.14 |
| <b>MCP</b>         | 0.59               | 0.16  | 0.32                    | 0.45  | -0.47                   | 0.29 |

Table S9. Pearson's correlation coefficients and associated p-values between white matter FA and sIPSC frequencies recorded from the SS, putamen, and caudate.

|                    | SS sIPSC Frequency |      | Putamen sIPSC Frequency |      | Caudate sIPSC Frequency |      |
|--------------------|--------------------|------|-------------------------|------|-------------------------|------|
|                    | r                  | p    | r                       | p    | r                       | p    |
| <b>CC</b>          | 0.40               | 0.37 | 0.0059                  | 0.99 | 0.16                    | 0.73 |
| <b>ALIC</b>        | 0.47               | 0.29 | 0.29                    | 0.48 | 0.44                    | 0.32 |
| <b>PLIC</b>        | 0.55               | 0.20 | 0.13                    | 0.76 | 0.38                    | 0.40 |
| <b>AC</b>          | -0.019             | 0.97 | 0.34                    | 0.41 | 0.078                   | 0.87 |
| <b>Fornix</b>      | 0.68               | 0.10 | 0.29                    | 0.48 | 0.49                    | 0.27 |
| <b>CST</b>         | 0.35               | 0.45 | -0.062                  | 0.88 | 0.029                   | 0.95 |
| <b>SCP</b>         | 0.38               | 0.40 | 0.31                    | 0.45 | 0.15                    | 0.74 |
| <b>EC</b>          | 0.57               | 0.18 | 0.045                   | 0.92 | 0.36                    | 0.42 |
| <b>PTR</b>         | 0.45               | 0.31 | 0.29                    | 0.49 | 0.56                    | 0.19 |
| <b>Cereb. Ped.</b> | 0.46               | 0.30 | 0.30                    | 0.48 | 0.47                    | 0.29 |
| <b>MCP</b>         | 0.50               | 0.26 | 0.50                    | 0.21 | 0.61                    | 0.14 |
